# Supplementary material for: Cell Type-Specific Oxidative Stress Genomic Signatures in the Globus Pallidus of Dopamine-Depleted Mice
Source: J Neurosci. 2020 Dec 9;40(50):9772–83. doi: 10.1523/JNEUROSCI.1634-20.2020 (PMC7726543; doi:10.1523/JNEUROSCI.1634-20.2020)
Supplement: Figure 4-2 — RNA-seq sample similarities. A. The first two principal components separate samples by brain region and cell type. B. In hierarchical clustering, samples mainly cluster by brain region and then cell type. Download Figure 4-2, XLSX file. [file ns-JN-RM-1634-20-s03.xlsx]

## Sheet: Fig. 4-3
Figure 4-3: Differentially expressed genes with dopamine depletion
Cortex, PV+						Cortex, PV-						Striatum, PV+						Striatum, PV-						GPe, PV+						GPe, PV-
DD-Increasing			DD-Decreasing			DD-Increasing			DD-Decreasing			DD-Increasing			DD-Decreasing			DD-Increasing			DD-Decreasing			DD-Increasing			DD-Decreasing			DD-Increasing			DD-Decreasing
gene	log2FoldChange	padj	gene	log2FoldChange	padj	gene	log2FoldChange	padj	gene	log2FoldChange	padj	gene	log2FoldChange	padj	gene	log2FoldChange	padj	gene	log2FoldChange	padj	gene	log2FoldChange	padj	gene	log2FoldChange	padj	gene	log2FoldChange	padj	gene	log2FoldChange	padj	gene	log2FoldChange	padj
									ENSMUSG00000075015	0.000113239	5.99494e-13													ENSMUSG00000026072	-0.000149729	0.175138	ENSMUSG00000103889	0.00017378	0.0248451				ENSMUSG00000063052	0.000231884	0.000862409
									ENSMUSG00000095280	4.51256e-05	0.0246526													ENSMUSG00000026193	-0.000192612	0.0205357	ENSMUSG00000079550	0.000142014	0.19543				ENSMUSG00000087139	0.000297396	2.8503e-09
									ENSMUSG00000097312	3.60115e-05	0.0250653													ENSMUSG00000066842	-0.000151758	0.199787	ENSMUSG00000097760	0.000174207	0.0578463				ENSMUSG00000021223	0.000200205	0.00528945
																								ENSMUSG00000044033	-0.000234394	0.00049321	ENSMUSG00000097403	0.000133088	0.0675197				ENSMUSG00000003279	0.000167413	0.0852395
																								ENSMUSG00000003617	-0.000202582	0.00972995	ENSMUSG00000099868	0.000166568	0.1053
																								ENSMUSG00000039167	-0.000180463	0.0381075	ENSMUSG00000085184	0.000182053	0.00512245
																								ENSMUSG00000038007	-0.000207905	0.00945635	ENSMUSG00000103050	0.000166822	0.00945635
																								ENSMUSG00000028645	-0.000212709	0.00570805	ENSMUSG00000027285	0.000145622	0.169785
																								ENSMUSG00000040584	-0.000197709	0.00972995	ENSMUSG00000037307	0.000106831	0.199787
																								ENSMUSG00000029484	-0.000158185	0.156969	ENSMUSG00000082383	0.0002122	0.00363216
																								ENSMUSG00000029648	-0.000204686	0.00397856	ENSMUSG00000058174	0.000140734	0.199787
																								ENSMUSG00000029802	-0.000172625	0.0730654	ENSMUSG00000054312	0.000167051	0.0865293
																								ENSMUSG00000030235	-0.000215914	0.00397856	ENSMUSG00000082394	0.000151261	0.00972995
																								ENSMUSG00000019899	-0.000165866	0.0706471	ENSMUSG00000028197	0.000193376	0.00397856
																								ENSMUSG00000020044	-0.000190621	0.0223595	ENSMUSG00000081516	0.000163016	0.00972995
																								ENSMUSG00000019966	-0.000158436	0.173008	ENSMUSG00000003411	0.000154305	0.175138
																								ENSMUSG00000020154	-0.00018672	0.0250609	ENSMUSG00000041025	0.000194341	0.00945635
																								ENSMUSG00000001946	-0.000150356	0.1053	ENSMUSG00000029452	0.000213558	0.00397856
																								ENSMUSG00000036814	-0.000174164	0.0675197	ENSMUSG00000044092	0.000143621	0.0222732
																								ENSMUSG00000057098	-0.00015293	0.18333	ENSMUSG00000086894	0.000130218	0.0675197
																								ENSMUSG00000021360	-0.000152422	0.157639	ENSMUSG00000023089	0.000156259	0.175138
																								ENSMUSG00000064373	-0.000165907	0.106045	ENSMUSG00000004270	0.000202079	0.00945635
																								ENSMUSG00000005125	-0.000158403	0.173008	ENSMUSG00000008496	0.000154823	0.173008
																								ENSMUSG00000048939	-0.000153076	0.1053	ENSMUSG00000030588	0.000163544	0.0675197
																								ENSMUSG00000056492	-0.000199096	0.00972995	ENSMUSG00000096677	0.000112319	0.12629
																								ENSMUSG00000024140	-0.000177646	0.0419362	ENSMUSG00000030871	0.000151957	0.173008
																								ENSMUSG00000033960	-0.000190591	0.0185654	ENSMUSG00000055681	0.00015744	0.175138
																								ENSMUSG00000069833	-0.000168096	0.0914594	ENSMUSG00000087639	0.000175033	0.00397856
																											ENSMUSG00000032109	0.00013124	0.169785
																											ENSMUSG00000039438	0.000144733	0.0226871
																											ENSMUSG00000020191	0.000144821	0.18333
																											ENSMUSG00000057058	0.000164726	0.1053
																											ENSMUSG00000037992	0.000155689	0.161276
																											ENSMUSG00000047415	0.000154293	0.19543
																											ENSMUSG00000099907	0.00015193	0.12629
																											ENSMUSG00000051989	0.00016492	0.0981217
																											ENSMUSG00000023795	0.000153096	0.175138
																											ENSMUSG00000055839	0.000231411	0.00255225
																											ENSMUSG00000063239	0.000178015	0.0493237
																											ENSMUSG00000024319	0.000155197	0.175138
																											ENSMUSG00000038545	0.00015478	0.18333
																											ENSMUSG00000086213	0.000119418	0.0691239

## Sheet: Fig. 4-5
Figure 4-5: Functional enrichment of DD-affected genes in GPe PV+ neurons
				DD-Increasing genes		DD-Decreasing genes
source	term_name	term_id	term_size	adjusted_p_value__DDincreasing	intersection_size__DDincreasing	adjusted_p_value	intersection_size
GO:MF	xenobiotic transmembrane transporter activity	GO:0042910	17	0.000456636	3	1	-1
GO:MF	efflux transmembrane transporter activity	GO:0015562	11	0.030115	2	1	-1
GO:BP	xenobiotic transport	GO:0042908	24	0.00782006	3	1	-1
GO:BP	positive regulation of cell migration	GO:0030335	553	0.0109929	7	1	-1
GO:BP	positive regulation of cell motility	GO:2000147	576	0.0143511	7	1	-1
GO:BP	positive regulation of cellular component movement	GO:0051272	599	0.0185245	7	1	-1
GO:BP	positive regulation of locomotion	GO:0040017	606	0.0199789	7	1	-1
GO:BP	multicellular organism development	GO:0007275	5293	0.0231429	18	1	6
GO:BP	blood vessel morphogenesis	GO:0048514	628	0.025183	7	1	1
GO:BP	regulation of cell migration	GO:0030334	911	0.0306807	8	1	-1
GO:BP	regulation of cell motility	GO:2000145	962	0.0454723	8	1	-1
GO:CC	plasma membrane	GO:0005886	6226	0.00101142	20	1	6
GO:CC	cell periphery	GO:0071944	6375	0.00150834	20	1	6
GO:CC	basement membrane	GO:0005604	104	0.00200866	4	1	-1
GO:CC	apical part of cell	GO:0045177	436	0.00369108	6	1	-1
GO:CC	membrane	GO:0016020	10136	0.0070692	24	1	15
GO:CC	collagen-containing extracellular matrix	GO:0062023	339	0.0144967	5	1	1
GO:CC	apical plasma membrane	GO:0016324	352	0.0173112	5	1	-1
KEGG	Bile secretion	KEGG:04976	67	0.0319786	3	1	-1
WP	Focal Adhesion-PI3K-Akt-mTOR-signaling pathway	WP:WP2841	290	0.0114043	6	1	-1
